# Supplementary material
Source: Royal Society of Chemistry journal article supplement (doi:10.1039/d6ew00198j)
Supplement: d6ew00198j1.pdf [file d6ew00198j1.pdf]

**Supplementary Information for:**

**Effect of side-stream conditions on the release of dissolved  
organic matter in side-stream enhanced biological phosphorus  
removal process**

Xinyu Jing<sup>a, b</sup>, Dongqi Wang<sup>a, b, \*</sup>, Lu Qin<sup>b, c, \*</sup>, Haiyu Meng<sup>b</sup>, Yuxin Song<sup>b</sup>, Xiaosheng  
Jing<sup>d</sup>, Mingqi Zhu<sup>b</sup>, Yishan Lin<sup>e</sup>, Ruoyu Wu<sup>b</sup>, Jiake Li<sup>a, b</sup>

<sup>a</sup>State Key Laboratory of Water Engineering Ecology and Environment in Arid Area,  
Xi'an University of Technology, Xi'an, Shaanxi 710048, China

<sup>b</sup>Department of Municipal and Environmental Engineering, School of Eco-  
environmental & Chemical Engineering, Xi'an University of Technology, Xi'an,  
Shaanxi 710048, China

<sup>c</sup>School of Environmental Science and Engineering, Shaanxi University of Science &  
Technology, Xi'an, Shaanxi 710021, China

<sup>d</sup>Shaanxi Zhongsheng Eco-environmental Consulting Services Co., Ltd., Shaanxi  
Environmental Protection Industry Group Co., Ltd., Xi'an, Shaanxi 710076, China

<sup>e</sup>Xi'an Key Laboratory of Environmental Simulation and Ecological Health in the  
Yellow River Basin, College of Urban and Environmental Sciences, Northwest  
University, Xi'an, Shaanxi 710127, China

\*Corresponding authors at: State Key Laboratory of Water Engineering Ecology and  
Environment in Arid Area, Xi'an University of Technology, Xi'an, Shaanxi 710048,  
China. E-mail address: wangdq@xaut.edu.cn (D. Wang); School of Environmental  
Science and Engineering, Shaanxi University of Science & Technology, Xi'an,

Shaanxi 710021, China. E-mail address: luqin@sust.edu.cn (L. Qin)

## **Contents**

### **1. Figures**

Fig. S1 Schematic of the S2EBPR reactor and operational configuration.

Fig. S2 Changes in the degree of DOM humification.

Fig. S3 Relative abundance of fluorescent components in EPS: (a) LB-EPS; (b) TB-EPS.

Fig. S4 Principal component analysis of DOM-related spectral parameters.

### **2. Tables**

Table S1 Corresponding relationship between  $SRT_{SS}$  and RAS split ratio.

Table S2 Three-dimensional fluorescence spectral region.

Table S3 PCA component loading matrix.

### **3. Methods**

1. Figures:

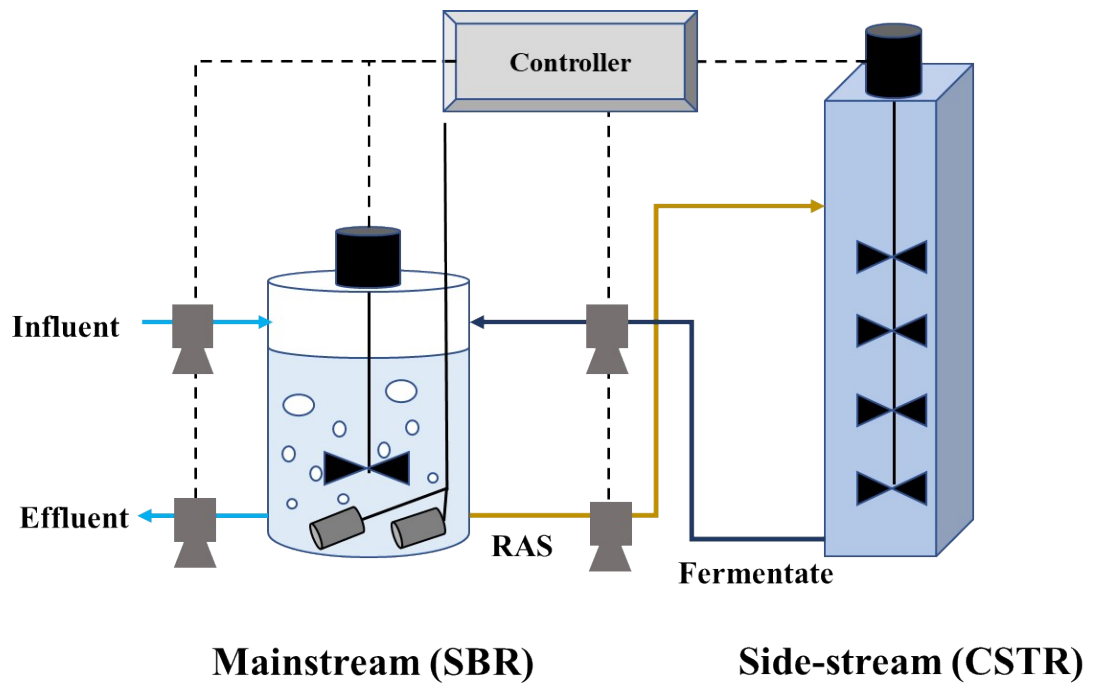

Fig. S1 Schematic of the S2EBPR reactor and operational configuration.

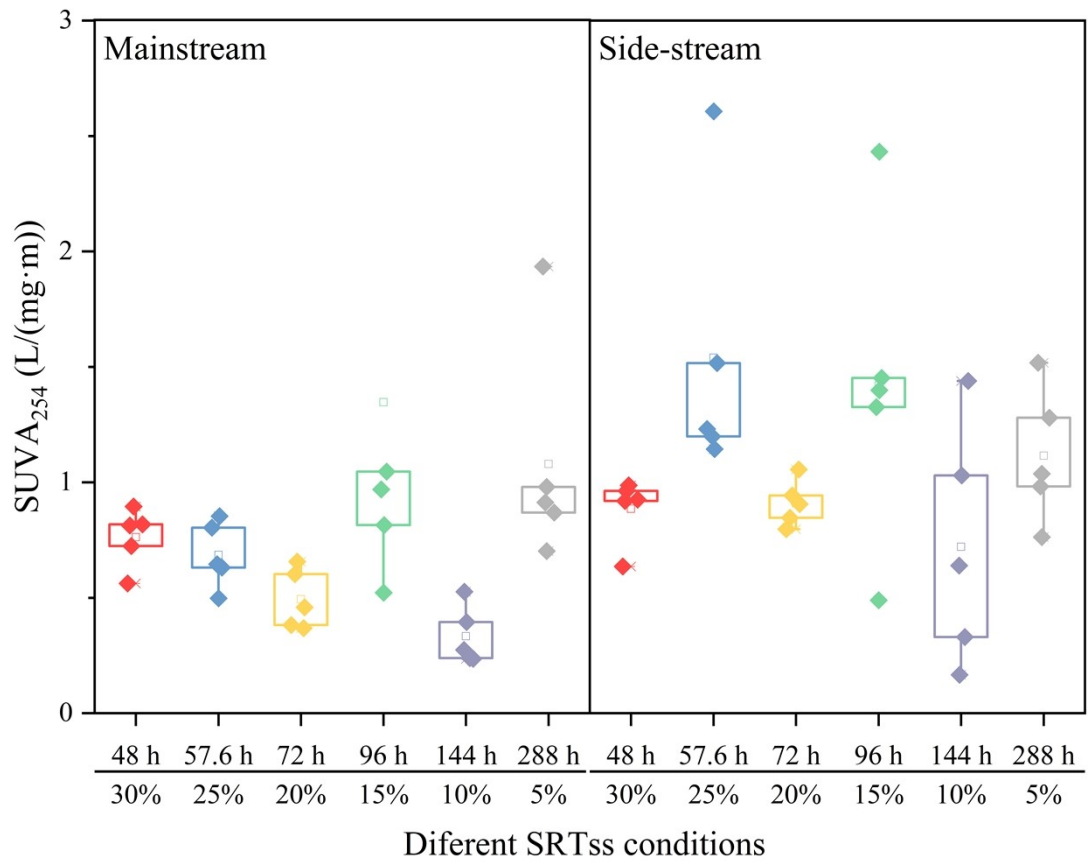

Fig. S2 Changes in the degree of DOM humification.

■ C1: Tyrosine-like proteins ■ C2: Microbial byproducts ■ C3: Humic acids

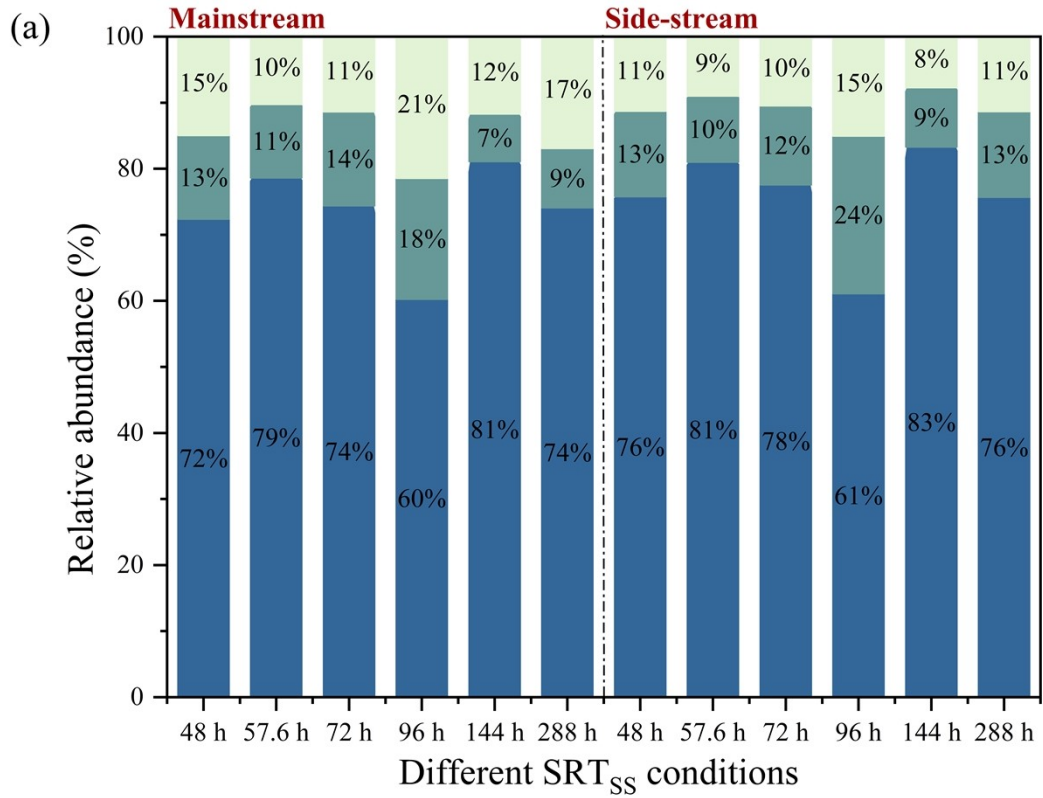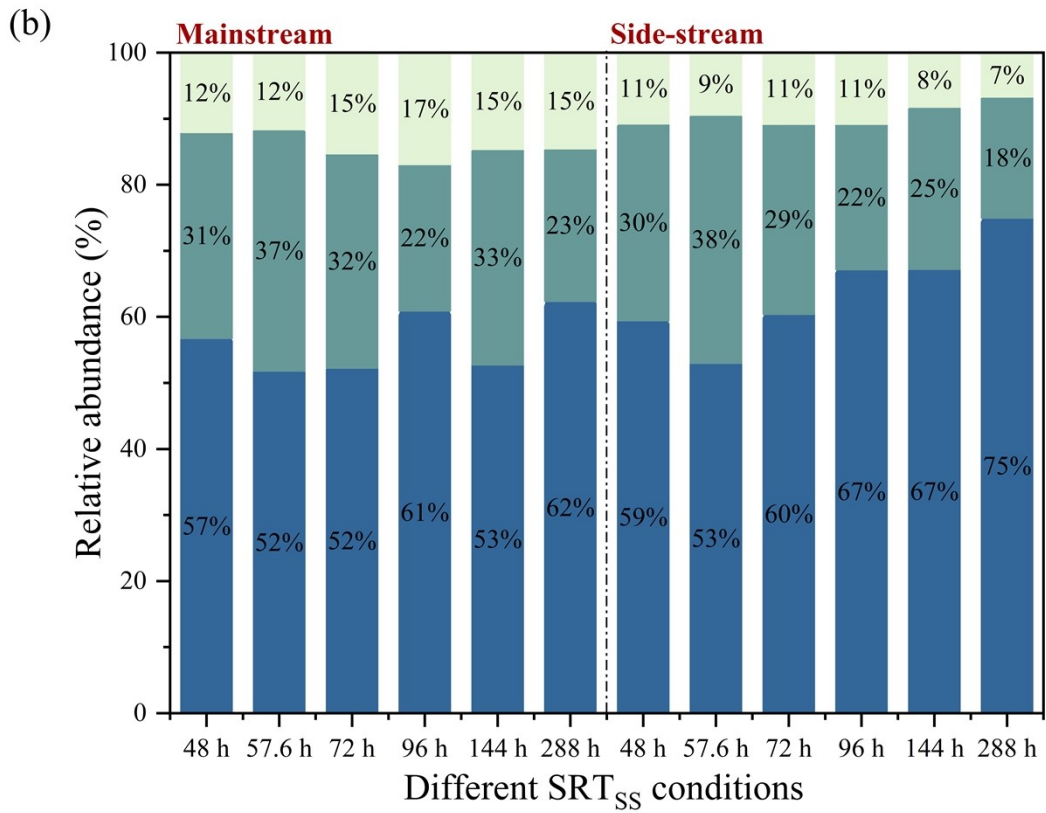

Fig. S3 Relative abundance of fluorescent components in EPS: (a) LB-EPS; (b) TB-EPS.

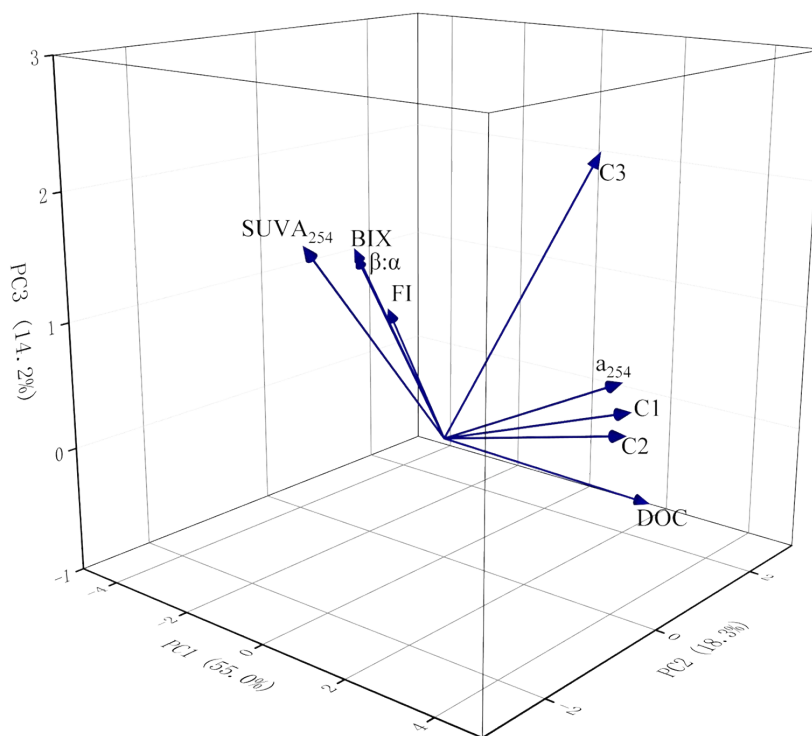

Fig. S4 Principal component analysis of DOM-related spectral parameters.

## 2.Tables:

Table S1 Corresponding relationship between  $SRT_{SS}$  and RAS split ratio.

| RAS split ratio (%) | $SRT_{SS}$ (h) |
|---------------------|----------------|
| 30                  | 48             |
| 25                  | 57.6           |
| 20                  | 72             |
| 15                  | 96             |
| 10                  | 144            |
| 5                   | 288            |

Table S2 Three-dimensional fluorescence spectral region.

| Region     | Excitation (Ex) (nm) | Emission (Em) (nm) | Representative Substances | Description & Characteristics                                                                    |
|------------|----------------------|--------------------|---------------------------|--------------------------------------------------------------------------------------------------|
| Region I   | 200 - 250            | 280 - 330          | Tyrosine-like proteins    | Aromatic protein-like substance I; typically associated with high biodegradability.              |
| Region II  | 200 - 250            | 330 - 380          | Tryptophan-like proteins  | Aromatic protein-like substance II; reflects impacts from domestic sewage or microbial activity. |
| Region III | 200 - 250            | 380 - 550          | Fulvic acid-like          | Highly soluble with relatively low molecular weight; ubiquitous in various natural water bodies. |
| Region IV  | 250 - 450            | 280 - 380          | Microbial byproducts      | Soluble microbial products (SMPs); closely related to microbial growth and decay processes.      |
| Region V   | 250 - 450            | 380 - 550          | Humic acid-like           | Higher molecular weight and hydrophobicity; represents more mature/stable organic matter.        |

Table S3 PCA component loading matrix.

|                     | Component |        |        |
|---------------------|-----------|--------|--------|
|                     | C1        | C2     | C3     |
| DOC                 | 2.735     | 1.929  | -0.660 |
| SUVA <sub>254</sub> | -0.244    | -2.133 | 1.789  |
| FI                  | -2.588    | 0.750  | 0.764  |
| $\beta:\alpha$      | -3.739    | 0.917  | 1.126  |
| BIX                 | -3.683    | 0.857  | 1.192  |
| C1                  | 4.275     | 0.054  | 0.588  |
| C2                  | 4.307     | -0.059 | 0.433  |
| C3                  | 2.308     | 1.047  | 2.282  |
| a <sub>254</sub>    | 4.032     | 0.084  | 0.786  |

### 3.Methods:

UV absorbance index:

- i. a<sub>254</sub>

$$a_{254} = 2.303 \times \frac{A_{254}}{L}$$

where:

$A_{254}$  is UV absorbance at 254 nm;

$L$  (m) is optical path length;

$a_{254}$  ( $m^{-1}$ ) is the absorbance coefficient at 254 nm representing the abundance of humus in DOM.

ii.  $SUVA_{254}$

$$SUVA_{254} = \frac{UV_{254} \times 100}{DOC}$$

where:

$UV_{254}$  ( $m^{-1}$ ) is the UV absorbance of the water sample at 254 nm;

DOC (mg/L) is the dissolved organic carbon concentration;

$SUVA_{254}$  ( $L/(mg \cdot m)$ ) is the specific UV absorbance at 254 nm representing DOM aromaticity.
